# Supplementary material for: Distribution of Minor and Major Metallic Elements in Residential Indoor Dust: A Case Study in Latvia
Source: MDPI journal article supplement (doi:10.3390/ijerph20136207), 2023-06-22
Supplement: s1 [file s1]

**Table S1:** Arithmetic mean concentrations of metallic elements (mg kg<sup>-1</sup>) with standard deviations and minimal and maximal values detected in indoor dust samples obtained from different parts of dwellings in urban (Urb), suburban (Sub) and rural (Rur) regions of Latvia.

| Sampling site           |                                | Conc., mg kg <sup>-1</sup> |                          |                             |                           |                           |                           |                             |                          |                          |                          |                          |                          |                          |                         |                          |                          |                          |                           |                          |                          |                          |                          |                          |                          |                          |
|-------------------------|--------------------------------|----------------------------|--------------------------|-----------------------------|---------------------------|---------------------------|---------------------------|-----------------------------|--------------------------|--------------------------|--------------------------|--------------------------|--------------------------|--------------------------|-------------------------|--------------------------|--------------------------|--------------------------|---------------------------|--------------------------|--------------------------|--------------------------|--------------------------|--------------------------|--------------------------|--------------------------|
|                         |                                | Li                         | B                        | Na                          | Mg                        | Al                        | K                         | Ca                          | V                        | Cr                       | Mn                       | Fe                       | Co                       | Ni                       | Cu                      | Zn                       | As                       | Se                       | Rb                        | Sr                       | Cd                       | Ba                       | La                       | Ce                       | Pb                       | Bi                       |
| Urban                   | Living room (n=16)             | 3.42±2.50<br>(1.21-7.23)   | 38.0±17.8<br>(13.5-58.0) | 5400±3240<br>(2730-11400)   | 3650±840<br>(2770-4530)   | 1660±910<br>(700-3640)    | 3870±1400<br>(2440-6210)  | 19300±9600<br>(11000-31700) | 3.80±2.67<br>(1.10-9.87) | 61.2±24.6<br>(28.2-111)  | 74.0±40.2<br>(24.5-141)  | 3170±1540<br>(1170-6150) | 3.60±2.45<br>(0.68-8.50) | 54.0±145<br>(1.95-513)   | 105±89<br>(41.0-287)    | 397±134<br>(234-691)     | 0.70±0.38<br>(0.33-1.60) | 0.23±0.13<br>(0.03-0.41) | 5.83±0.79<br>(5.05-7.67)  | 50.8±40.2<br>(19.1-129)  | 0.92±1.10<br>(0.10-2.12) | 181±194<br>(63.0-563)    | 4.63±2.84<br>(1.12-8.65) | 9.03±5.15<br>(3.42-16.2) | 52.1±74.4<br>(0.7-263)   | 2.90±2.88<br>(0.21-7.36) |
|                         | Kitchen (n=6)                  | 3.13±2.04<br>(1.12-8.42)   | 132±89.2<br>(15.0-258)   | 5590±3330<br>(1680-12700)   | 5340±4400<br>(2820-15900) | 2680±3040<br>(720-10600)  | 4330±780<br>(3180-5600)   | 18000±11700<br>(1290-42700) | 6.23±7.93<br>(0.80-27.0) | 69.4±60.7<br>(22.0-205)  | 156±135<br>(35.5-397)    | 4000±3490<br>(979-12600) | 3.07±1.50<br>(0.82-5.25) | 20.2±11.5<br>(2.05-38.0) | 100±51.0<br>(26.5-174)  | 385±253<br>(118-1020)    | 1.05±1.02<br>(0.03-3.12) | 0.42±0.45<br>(0.05-1.40) | 8.72±6.55<br>(5.15-24.6)  | 45.2±49.8<br>(18.3-167)  | 0.43±0.36<br>(0.13-1.08) | 98.2±49.1<br>(51.0-195)  | 7.03±7.88<br>(1.08-23.4) | 14.1±16.0<br>(3.87-44.6) | 21.6±11.6<br>(7.80-43.4) | 5.33±7.98<br>(0.22-24.1) |
|                         | Bedroom (n=24)                 | 3.04±2.94<br>(0.42-9.72)   | 100±87.3<br>(12.0-233)   | 3390±2020<br>(1120-8840)    | 2990±1620<br>(1160-5780)  | 1110±680<br>(270-2880)    | 5520±3350<br>(1380-12800) | 10500±8800<br>(1040-30600)  | 2.73±2.44<br>(0.01-8.10) | 35.0±19.5<br>(8.89-79.0) | 62.8±44.0<br>(6.82-143)  | 2420±2050<br>(215-7170)  | 2.85±3.01<br>(0.84-11.0) | 14.9±10.8<br>(0.07-43.0) | 97.2±58.4<br>(27.3-247) | 826±1090<br>(176-4090)   | 1.15±0.87<br>(0.01-3.35) | 0.50±0.25<br>(0.08-1.10) | 5.77±1.57<br>(2.85-9.80)  | 28.8±13.6<br>(11.1-50.2) | 0.44±0.46<br>(0.01-1.72) | 151±140<br>(20.3-516)    | 2.13±0.76<br>(0.07-4.33) | 4.03±2.76<br>(1.04-8.12) | 28.8±38.8<br>(5.71-173)  | 5.11±5.15<br>(0.41-17.5) |
|                         |                                | Corridor** (n=2)           | 1.03<br>15.7             | 18.2<br>58.0                | 1860<br>4550              | 1900<br>5900              | 730<br>3170               | 2300<br>418                 | 4020<br>33000            | 0.70<br>11.2             | 29.0<br>120              | 27.2<br>176              | 865<br>19400             | 0.80<br>9.20             | 1.95<br>26.8            | 31.3<br>175              | 152<br>12100             | 0.14<br>11.7             | 0.13<br>0.87              | 4.72<br>6.38             | 17.4<br>65.5             | 0.44<br>1.52             | 80.3<br>412              | 1.30<br>4.35             | 3.20<br>7.85             | 6.06<br>120              |
| Suburban                | Living room and kitchen (n=21) | 3.42±2.76<br>(0.63-5.05)   | 62.5±73.0<br>(11.7-113)  | 4660±630<br>(4210-5110)     | 2980±220<br>(2830-3140)   | 3492±2940<br>(860-9140)   | 4980±1660<br>(3810-6160)  | 17900±11400<br>(9890-57000) | 6.04±3.66<br>(2.01-11.0) | 54.4±55.5<br>(4.93-158)  | 104±82.2<br>(37.6-243)   | 3792±2843<br>(1090-8910) | 3.35±1.85<br>(0.65-5.05) | 13.4±12.5<br>(0.62-34.8) | 58.0±48.5<br>(5.71-144) | 244±138<br>(59.2-402)    | 1.30±0.82<br>(0.68-2.40) | 0.42±0.09<br>(0.34-0.46) | 7.22±5.54<br>(3.78-12.0)  | 51.3±4.76<br>(46.8-55.0) | nd                       | 170±170<br>(50.4-291)    | 3.78±4.62<br>(0.91-7.60) | 9.04±10.3<br>(1.64-16.2) | 17.3±10.5<br>(4.3-35.0)  | 0.32±0.07<br>(0.28-0.37) |
|                         | Bedroom (n=10)                 | 4.85±2.40<br>(0.85-8.10)   | 38.0±41.2<br>(9.85-97.0) | 16700±23540<br>(3430-52000) | 3630±1070<br>(2460-5050)  | 2830±1720<br>(800-6820)   | 2290±340<br>(1840-2680)   | 17600±8130<br>(11900-29400) | 4.33±1.85<br>(0.80-5.95) | 33.8±17.0<br>(12-65)     | 57.7±19.1<br>(26.0-93.8) | 2754±1402<br>(838-4680)  | 2.05±0.95<br>(0.74-4.21) | 8.95±5.65<br>(3.65-21.0) | 59.0±31.8<br>(28.2-132) | 754±654<br>(206-1950)    | 0.64±0.55<br>(0.01-1.70) | 0.09±0.04<br>(0.09-0.2)  | 5.05±0.95<br>(3.85-7.10)  | 61.4±16.8<br>(45.5-81.2) | 0.06*                    | 62.4±22.1<br>(44.7-95.0) | 3.3-±0.51<br>(2.82-3.84) | 5.72±0.68<br>(5.10-6.51) | 16.4±15.4<br>(4.92-58.8) | 0.56±0.18<br>(0.37-0.72) |
|                         | Corridor** (n=2)               | 0.30<br>3.31               | 14.4<br>406              | 4320<br>4800                | 870<br>4960               | 450<br>1800               | 2390<br>4030              | 4220<br>31700               | 0.83<br>5.78             | 24.2<br>44.0             | 31.3<br>101              | 627<br>4345              | 0.44<br>4.90             | 1.05<br>10.6             | 35.0<br>58.6            | 84.0<br>196              | 0.92<br>1.40             | 0.10<br>0.12             | 3.94<br>6.05              | 13.8<br>116              | 0.20<br>1.05             | 32.4<br>91.0             | 2.83<br>3.40             | 5.02<br>7.85             | 0.44<br>41.0             | 2.10<br>3.05             |
| Rural                   | Living room (n=17)             | 2.40±1.55<br>(0.33-4.60)   | 71.2±90.0<br>(14.1-230)  | 4260±1290<br>(2890-6200)    | 3340±1700<br>(870-5600)   | 1140±930<br>(330-2740)    | 4990±960<br>(4030-6080)   | 15300±7140<br>(4220-23800)  | 2.80±2.65<br>(0.10-7.12) | 38.0±28.5<br>(16.5-92.0) | 67.5±53.5<br>(16.0-163)  | 2050±1630<br>(187-4630)  | 2.01±1.40<br>(0.35-4.53) | 9.05±5.65<br>(0.95-19.0) | 159±354<br>(30.3-1100)  | 226±160<br>(84.4-495)    | 0.64±0.60<br>(0.12-1.40) | 0.40±0.28<br>(0.01-0.70) | 7.88±2.02<br>(3.73-10.0)  | 34.3±22.6<br>(14.0-72.4) | 0.43±0.37<br>(0.22-1.04) | 260±376<br>(32-920)      | 5.04±2.24<br>(2.85-7.08) | 8.63±4.02<br>(4.92-13.0) | 10.3±15.5<br>(0.27-39.1) | 1.40±1.19<br>(0.16-3.09) |
|                         | Kitchen (n=4)                  | 2.31±1.80<br>(0.01-5.44)   | 51.5±40.2<br>(2.94-117)  | 5140±4130<br>(690-11000)    | 4570±2980<br>(500-9440)   | 1850±1190<br>(260-3860)   | 3460±2034<br>(122-6080)   | 14600±10100<br>(2860-32500) | 4.82±3.50<br>(0.36-11.3) | 38.3±18.8<br>(12.0-66.2) | 111±72.4<br>(7.95-233)   | 4195±3879<br>(327-12800) | 2.60±2.05<br>(0.26-5.70) | 17.2±23.0<br>(3.85-74.4) | 60.2±47.1<br>(18.0-170) | 260±173<br>(57.0-520)    | 1.20±0.60<br>(0.46-2.02) | 0.64±0.55<br>(0.11-1.61) | 6.06±4.13<br>(2.97-12.3)  | 33.4±8.79<br>(21.2-47.0) | 0.53±0.27<br>(0.32-1.04) | 180±291<br>(7.01-926)    | 3.21±2.63<br>(0.24-6.60) | 6.80±5.11<br>(0.33-12.7) | 17.1±15.3<br>(0.78-39.2) | 0.96±0.70<br>(0.16-1.99) |
|                         | Bedroom (n=11)                 | 2.20±1.75<br>(0.50-5.72)   | 42.5±20.3<br>(8.88-83.0) | 4280±2330<br>(1520-7870)    | 3600±2300<br>(1130-7060)  | 1840±1340<br>(6810-4490)  | 4650±1420<br>(2810-7050)  | 16800 ±12300<br>(851-33900) | 4.40±3.85<br>(0.85-12.4) | 51.5±20.0<br>(30.7-85.2) | 94.0±77.5<br>(28.6-255)  | 3150±2280<br>(856-7640)  | 3.55±1.68<br>(0.70-6.61) | 13.3±4.55<br>(7.02-20.1) | 85.0±38.2<br>(24.5-145) | 701±652<br>(103-2524)    | 1.01±0.58<br>(0.20-2.14) | 0.60±0.48<br>(0.13-1.50) | 7.44±4.05<br>(2.97-14.1)  | 29.7±12.0<br>(13.5-51.3) | 0.61±0.45<br>(0.34-1.67) | 215±270<br>(40.0-983)    | 3.01±2.93<br>(0.34-6.70) | 6.35±5.03<br>(1.96-14.0) | 23.9±18.8<br>(4.50-66.1) | 2.89±5.06<br>(0.22-17.6) |
|                         | Corridor** (n=2)               | 1.40<br>3.03               | 19.5<br>40.7             | 3310<br>6190                | 3830<br>5600              | 1250<br>2490              | 4700<br>6080              | 15000<br>18300              | 3.96<br>6.05             | 19.5<br>57.6             | 95.0<br>134              | 2520<br>4360             | 2.98<br>5.03             | 8.95<br>9.97             | 29.5<br>56.4            | 182<br>495               | 0.55<br>1.04             | 0.33<br>0.68             | 7.85<br>10.2              | 30.3<br>31.5             | 0.14<br>0.30             | 60.4<br>926              | 5.05<br>6.92             | 4.95<br>13.2             | 8.25<br>39.1             | 0.20<br>1.50             |
| Smoking inside (n=16)   |                                | 3.41±2.23<br>(0.33-9.12)   | 47.0±29.6<br>(7.40-113)  | 6880±5160<br>(1740-22600)   | 5030±2930<br>(1040-12300) | 3130±2340<br>(1050-10600) | 4470±1830<br>(1430-7220)  | 19000±9000<br>(3870-37100)  | 6.83±4.99<br>(1.03-18.0) | 46.9±28.1<br>(9.42-106)  | 163±196<br>(23.8-865)    | 4560±2820<br>(572-11200) | 3.95±3.6<br>(0.30-13.6)  | 14.5±9.6<br>(1.30-41.9)  | 290±513<br>(29.0-1880)  | 1100±1530<br>(53.6-5600) | 1.36±1.81<br>(0.06-7.13) | 0.38±0.34<br>(0.04-1.50) | 8.20±3.82<br>(2.93-19.58) | 49.5±41.0<br>(15.6-182)  | 1.51±2.06<br>(0.05-6.37) | 262±317<br>(24.3-983)    | 6.45±4.95<br>(1.36-20.0) | 11.8±7.97<br>(2.10-31.5) | 187±310<br>(4.04-1180)   | 8.50±28.3<br>(0.13-114)  |
| Without smoking (n=104) |                                | 3.01±3.49<br>(0.01-15.7)   | 72.6±94.4<br>(2.94-406)  | 5430±2850<br>(690-52000)    | 3430±1980<br>(500-15900)  | 2010±1800<br>(260-8820)   | 3800±1600<br>(122-12800)  | 16800±11200<br>(851-57000)  | 4.71±4.00<br>(0.01-27.0) | 37.6±17.9<br>(4.93-205)  | 104±169<br>(6.82-397)    | 3180±2490<br>(187-19400) | 2.31±1.55<br>(0.26-11.0) | 20.7±53.1<br>(0.07-513)  | 75.9±64.7<br>(5.71-287) | 391±287<br>(57.0-1020)   | 0.83±1.50<br>(0.01-3.35) | 0.48±0.29<br>(0.02-1.61) | 7.03±5.94<br>(0.2-24.6)   | 46.6±56.0<br>(11.1-167)  | 0.68±0.65<br>(0.01-2.12) | 141±127<br>(7.01-920)    | 4.55±3.77<br>(0.07-23.4) | 8.49±7.16<br>(0.33-44.6) | 23.8±20.4<br>(0.27-263)  | 2.30±3.74<br>(0.16-24.1) |

\* Detected in one bedroom;

\*\* Only two samples;

nd – not detected.

**Table S2:** The determined concentrations of metallic elements in the 16 dust samples collected using both sampling techniques – vacuuming and manual collection with a brush and plastic spatula – in parallel.

| Sampling site | Sample No. | Sampling method | Conc., mg kg <sup>-1</sup> |      |       |      |      |       |      |       |      |      |      |      |      |      |      |
|---------------|------------|-----------------|----------------------------|------|-------|------|------|-------|------|-------|------|------|------|------|------|------|------|
|               |            |                 | Na                         | K    | Ca    | Al   | V    | Fe    | Co   | Zn    | Mn   | Cu   | Pb   | Cr   | Ni   | As   | Cd   |
| Urban         | 1          | Man             | 1130                       | 4050 | 1270  | 1850 | 4.80 | 2990  | 2.40 | 1000  | 94.0 | 174  | 21.0 | 103  | 20.5 | 0.84 | nd   |
|               |            | Vac             | 3050                       | 6410 | 7880  | 1660 | 5.00 | 5320  | 2.40 | 336   | 135  | 127  | 15.0 | 51.0 | 19.4 | 1.37 | 0.17 |
|               | 2          | Man             | 1430                       | 4110 | 1810  | 1740 | 4.80 | 3760  | 2.70 | 1200  | 126  | 247  | 21.0 | 35.0 | 42.7 | 0.71 | nd   |
|               |            | Vac             | 2870                       | 4960 | 11800 | 1510 | 3.80 | 2680  | 2.60 | 361   | 95.0 | 166  | 18.0 | 64.0 | 29.6 | 1.34 | 0.42 |
|               | 3          | Man             | 1680                       | 3180 | 1290  | 912  | 0.20 | 1650  | 2.00 | 960   | 63.0 | 127  | 16.0 | 36.0 | 23.7 | 0.78 | nd   |
|               |            | Vac             | 5670                       | 5600 | 17800 | 657  | 1.60 | 1860  | 1.00 | 695   | 51.0 | 96.0 | 8.90 | 19.0 | 22.0 | 0.56 | 0.11 |
|               | 4          | Man             | 1860                       | 3330 | 2860  | 348  | nd   | 215   | 0.90 | 176   | 7.00 | 27.0 | 7.00 | 22.0 | 1.69 | nd   | nd   |
|               |            | Vac             | 3560                       | 4580 | 32500 | 437  | 0.20 | 430   | 0.80 | 260   | 12.0 | 34.0 | 21.0 | 19.0 | 3.12 | nd   | nd   |
|               | 5          | Man             | 1120                       | 2810 | 850   | 1170 | 2.00 | 1170  | 1.40 | 283   | 38.0 | 45.0 | 0.66 | 67.0 | 7.42 | nd   | nd   |
|               |            | Vac             | 3800                       | 4860 | 30500 | 3030 | 9.90 | 6150  | 3.60 | 492   | 141  | 114  | 5.90 | 75.0 | 18.5 | 1.00 | 2.10 |
|               | 6          | Man             | 1370                       | 3150 | 1040  | 986  | 1.50 | 2650  | 5.40 | 314   | 39.0 | 55.0 | 38.0 | 92.0 | 4.85 | nd   | nd   |
|               |            | Vac             | 3160                       | 5470 | 26500 | 704  | 1.10 | 2280  | 5.00 | 385   | 25.0 | 45.0 | 65.0 | 64.0 | 2.18 | 0.70 | nd   |
|               | 7          | Man             | 2870                       | 2010 | 2890  | 640  | nd   | 689   | nd   | 713   | 16.0 | 65.0 | 20.0 | 11.0 | 0.07 | nd   | nd   |
|               |            | Vac             | 3050                       | 3650 | 30700 | 1050 | 2.70 | 3690  | 2.80 | 1120  | 72.0 | 69.0 | 35.0 | 21.0 | 15.1 | 1.34 | 0.76 |
|               | 8          | Man             | 2830                       | 1380 | 1040  | 3170 | 10.8 | 19400 | 9.10 | 12100 | 176  | 175  | 120  | 74.0 | 27.4 | 11.9 | nd   |
|               |            | Vac             | 4010                       | 3960 | 24300 | 1740 | 6.01 | 8300  | 6.50 | 1990  | 139  | 92.0 | 89.0 | 39.0 | 23.5 | 4.17 | 1.47 |
|               | 9          | Man             | 1120                       | 2300 | 4020  | 2880 | 8.11 | 6480  | 10.5 | 4100  | 119  | 121  | 60.0 | 41.0 | 17.8 | 2.85 | nd   |
|               |            | Vac             | 4940                       | 3210 | 33000 | 1890 | 6.02 | 7170  | 11.1 | 3220  | 143  | 95.0 | 173  | 54.0 | 26.2 | 2.65 | 1.71 |
| Suburban      | 10         | Man             | 1590                       | 2180 | 2510  | 860  | 3.98 | 2240  | 0.70 | 59.0  | 38.0 | 6.00 | 19.0 | 4.93 | 0.57 | 0.73 | nd   |
|               |            | Vac             | 3280                       | 3190 | 3210  | 9140 | 4.79 | 2230  | 3.10 | 210   | 64.0 | 44.0 | 11.0 | 74.0 | 6.16 | nd   | nd   |
|               | 11         | Man             | 2290                       | 782  | 2440  | 1810 | 4.48 | 2560  | 2.70 | 1950  | 66.0 | 62.0 | 13.0 | 65.0 | 20.9 | nd   | nd   |
|               |            | Vac             | 3590                       | 1620 | 4960  | 1820 | 2.10 | 1610  | 1.60 | 1710  | 54.0 | 72.0 | 9.05 | 50.0 | 6.06 | nd   | nd   |
| Rural         | 12         | Man             | 1520                       | 2810 | 3080  | 360  | 0.19 | 335   | 0.70 | 115   | 17.0 | 33.0 | 0.40 | 19.0 | 1.67 | nd   | nd   |
|               |            | Vac             | 2910                       | 3180 | 18300 | 550  | 1.25 | 1490  | 1.50 | 131   | 29.0 | 38.0 | 0.95 | 17.0 | 11.2 | nd   | 0.17 |
|               | 13         | Man             | 2460                       | 3660 | 5550  | 330  | 0.32 | 287   | 19.0 | 117   | 19.0 | 31.0 | 0.30 | 19.0 | 1.40 | nd   | nd   |
|               |            | Vac             | 2810                       | 4030 | 12600 | 520  | 0.40 | 327   | 18.0 | 145   | 29.0 | 41.0 | 0.95 | 18.0 | 3.21 | 0.10 | 0.20 |
|               | 14         | Man             | 1570                       | 3970 | 2890  | 1160 | 0.85 | 1180  | 1.90 | 779   | 40.0 | 79.0 | 19.0 | 42.0 | 6.55 | nd   | nd   |
|               |            | Vac             | 3510                       | 4850 | 11500 | 1190 | 3.10 | 2710  | 4.30 | 757   | 69.0 | 98.0 | 42.0 | 37.0 | 11.3 | 0.65 | 0.35 |
|               | 15         | Man             | 1740                       | 3330 | 3170  | 980  | 1.79 | 1550  | 2.20 | 420   | 38.0 | 54.0 | 10.0 | 85.0 | 7.00 | 0.23 | nd   |
|               |            | Vac             | 2890                       | 4700 | 15000 | 1510 | 4.07 | 3240  | 4.10 | 547   | 91.0 | 120  | 31.0 | 54.0 | 16.5 | 0.80 | 0.53 |
|               | 16         | Man             | 4320                       | 1760 | 3510  | 2590 | 5.95 | 12800 | 5.70 | 6900  | 118  | 894  | 36.0 | 51.0 | 309  | 1.55 | nd   |
|               |            | Vac             | 7510                       | 3750 | 18400 | 3860 | 11.3 | 6930  | 4.80 | 520   | 23.0 | 170  | 26.0 | 66.0 | 74.0 | 1.97 | 0.46 |

nd – not detected;

Man – manual dust sampling;

Vac – dust sampling by vacuum cleaner.

**Table S3:** Results of the Kruskal–Wallis test and the Mann–Whitney test for different dust sample groups depending on sampling site.

| Element | Kruskal–Wallis H | Mann–Whitney U |             |                    |                        |                    |                        |                 |                        |
|---------|------------------|----------------|-------------|--------------------|------------------------|--------------------|------------------------|-----------------|------------------------|
|         |                  | df             | Asymp. Sig. | Suburban vs. Urban | Asymp. Sig. (2-tailed) | Suburban vs. Rural | Asymp. Sig. (2-tailed) | Urban vs. Rural | Asymp. Sig. (2-tailed) |
| Li      | 1.68             | 2              | 0.43        |                    |                        |                    |                        |                 |                        |
| B       | 0.78             | 2              | 0.67        |                    |                        |                    |                        |                 |                        |
| Na      | 3.08             | 2              | 0.22        |                    |                        |                    |                        |                 |                        |
| Mg      | 0.45             | 2              | 0.80        |                    |                        |                    |                        |                 |                        |
| Al      | 6.96             | 2              | <b>0.03</b> | 326                | <b>0.01</b>            | 168                | <b>0.03</b>            | 839             | 0.60                   |
| K       | 4.05             | 2              | 0.13        |                    |                        |                    |                        |                 |                        |
| Ca      | 1.20             | 2              | 0.55        |                    |                        |                    |                        |                 |                        |
| V       | 0.36             | 2              | 0.83        |                    |                        |                    |                        |                 |                        |
| Cr      | 5.83             | 2              | 0.05        |                    |                        |                    |                        |                 |                        |
| Mn      | 0.75             | 2              | 0.69        |                    |                        |                    |                        |                 |                        |
| Fe      | 0.30             | 2              | 0.86        |                    |                        |                    |                        |                 |                        |
| Co      | 3.62             | 2              | 0.16        |                    |                        |                    |                        |                 |                        |
| Ni      | 4.94             | 2              | 0.09        |                    |                        |                    |                        |                 |                        |
| Cu      | 5.32             | 2              | 0.07        |                    |                        |                    |                        |                 |                        |
| Zn      | 2.02             | 2              | 0.36        |                    |                        |                    |                        |                 |                        |
| As      | 0.02             | 2              | 0.99        |                    |                        |                    |                        |                 |                        |
| Se      | 5.03             | 2              | 0.08        |                    |                        |                    |                        |                 |                        |
| Rb      | 0.52             | 2              | 0.77        |                    |                        |                    |                        |                 |                        |
| Sr      | 7.82             | 2              | <b>0.02</b> | 79                 | <b>0.02</b>            | 16                 | <b>0.001</b>           | 596             | 0.75                   |
| Cd      | 3.30             | 2              | 0.19        |                    |                        |                    |                        |                 |                        |
| Ba      | 2.75             | 2              | 0.25        |                    |                        |                    |                        |                 |                        |
| La      | 0.18             | 2              | 0.91        |                    |                        |                    |                        |                 |                        |
| Ce      | 0.78             | 2              | 0.68        |                    |                        |                    |                        |                 |                        |
| Pb      | 5.32             | 2              | 0.07        |                    |                        |                    |                        |                 |                        |
| Bi      | 3.64             | 2              | 0.16        |                    |                        |                    |                        |                 |                        |

The significance level is 0.050.

**Table S4:** Results of the Kruskal–Wallis test and the Mann–Whitney test for different dust sample groups depending on sampling location within the dwelling.

|           | Kruskal–Wallis H | df | Asymp. Sig. | Mann–Whitney U          |      |                         |             |                          |      |                     |              |                      |      |                      |             |
|-----------|------------------|----|-------------|-------------------------|------|-------------------------|-------------|--------------------------|------|---------------------|--------------|----------------------|------|----------------------|-------------|
|           |                  |    |             | Living room vs. Bedroom |      | Living room vs. Kitchen |             | Living room vs. Corridor |      | Bedroom vs. Kitchen |              | Bedroom vs. Corridor |      | Kitchen vs. Corridor |             |
| <b>Li</b> | 3.51             | 3  | 0.32        |                         |      |                         |             |                          |      |                     |              |                      |      |                      |             |
| <b>B</b>  | 11.82            | 3  | <b>0.01</b> | 338                     | 0.67 | 64.0                    | <b>0.01</b> | 20.0                     | 0.28 | 104                 | <b>0.007</b> | 22.0                 | 0.12 | 0.000                | <b>0.01</b> |
| <b>Na</b> | 7.51             | 3  | 0.06        |                         |      |                         |             |                          |      |                     |              |                      |      |                      |             |
| <b>Mg</b> | 9.27             | 3  | <b>0.03</b> | 280                     | 0.15 | 102                     | 0.16        | 23.0                     | 0.40 | 98.0                | <b>0.004</b> | 23.0                 | 0.13 | 17.0                 | 0.74        |
| <b>Al</b> | 3.97             | 3  | 0.26        |                         |      |                         |             |                          |      |                     |              |                      |      |                      |             |
| <b>K</b>  | 4.17             | 3  | 0.24        |                         |      |                         |             |                          |      |                     |              |                      |      |                      |             |
| <b>Ca</b> | 3.21             | 3  | 0.36        |                         |      |                         |             |                          |      |                     |              |                      |      |                      |             |
| <b>V</b>  | 7.09             | 3  | 0.07        |                         |      |                         |             |                          |      |                     |              |                      |      |                      |             |
| <b>Cr</b> | 2.51             | 3  | 0.47        |                         |      |                         |             |                          |      |                     |              |                      |      |                      |             |
| <b>Mn</b> | 8.47             | 3  | <b>0.04</b> | 634                     | 0.25 | 201                     | 0.08        | 78.0                     | 0.77 | 192                 | <b>0.003</b> | 97.0                 | 0.67 | 24.0                 | 0.15        |
| <b>Fe</b> | 5.28             | 3  | 0.15        |                         |      |                         |             |                          |      |                     |              |                      |      |                      |             |
| <b>Co</b> | 0.36             | 3  | 0.95        |                         |      |                         |             |                          |      |                     |              |                      |      |                      |             |
| <b>Ni</b> | 5.18             | 3  | 0.15        |                         |      |                         |             |                          |      |                     |              |                      |      |                      |             |
| <b>Cu</b> | 3.20             | 3  | 0.36        |                         |      |                         |             |                          |      |                     |              |                      |      |                      |             |
| <b>Zn</b> | 6.17             | 3  | 0.10        |                         |      |                         |             |                          |      |                     |              |                      |      |                      |             |
| <b>As</b> | 3.98             | 3  | 0.26        |                         |      |                         |             |                          |      |                     |              |                      |      |                      |             |
| <b>Se</b> | 2.55             | 3  | 0.47        |                         |      |                         |             |                          |      |                     |              |                      |      |                      |             |
| <b>Rb</b> | 2.49             | 3  | 0.48        |                         |      |                         |             |                          |      |                     |              |                      |      |                      |             |
| <b>Sr</b> | 2.96             | 3  | 0.40        |                         |      |                         |             |                          |      |                     |              |                      |      |                      |             |
| <b>Cd</b> | 0.49             | 3  | 0.92        |                         |      |                         |             |                          |      |                     |              |                      |      |                      |             |
| <b>Ba</b> | 0.91             | 3  | 0.82        |                         |      |                         |             |                          |      |                     |              |                      |      |                      |             |
| <b>La</b> | 7.06             | 3  | 0.07        |                         |      |                         |             |                          |      |                     |              |                      |      |                      |             |
| <b>Ce</b> | 6.96             | 3  | 0.07        |                         |      |                         |             |                          |      |                     |              |                      |      |                      |             |
| <b>Pb</b> | 0.53             | 3  | 0.91        |                         |      |                         |             |                          |      |                     |              |                      |      |                      |             |
| <b>Bi</b> | 3.00             | 3  | 0.39        |                         |      |                         |             |                          |      |                     |              |                      |      |                      |             |

The significance level is 0.050.

**Table S5:** Results of the Mann–Whitney test for two dust sample groups depending on smoking inside the dwelling.

|      |      |      |      |      |      |      |      |              |      |      |      |      |      |      |      |      |      |      |      |      |      |      |              |      |
|------|------|------|------|------|------|------|------|--------------|------|------|------|------|------|------|------|------|------|------|------|------|------|------|--------------|------|
| Li   | B    | Na   | Mg   | Al   | K    | Ca   | V    | Cr           | Mn   | Fe   | Co   | Ni   | Cu   | Zn   | As   | Se   | Rb   | Sr   | Cd   | Ba   | La   | Ce   | Pb           | Bi   |
| 0.49 | 0.56 | 0.41 | 0.34 | 0.43 | 0.75 | 0.87 | 0.05 | <b>0.004</b> | 0.10 | 0.08 | 0.68 | 0.38 | 0.18 | 0.65 | 0.54 | 0.83 | 0.87 | 0.96 | 0.43 | 0.93 | 0.47 | 0.43 | <b>0.003</b> | 0.34 |

The significance level is 0.050.
